# Supplementary material
Source: ML conference proceedings conference paper supplement (https://openreview.net/forum?id=jPaM3AiFLq)
Supplement: supplementary_material [file asymgs_supple_compressed.pdf › supplementary/asymgs_supple_compressed.pdf]

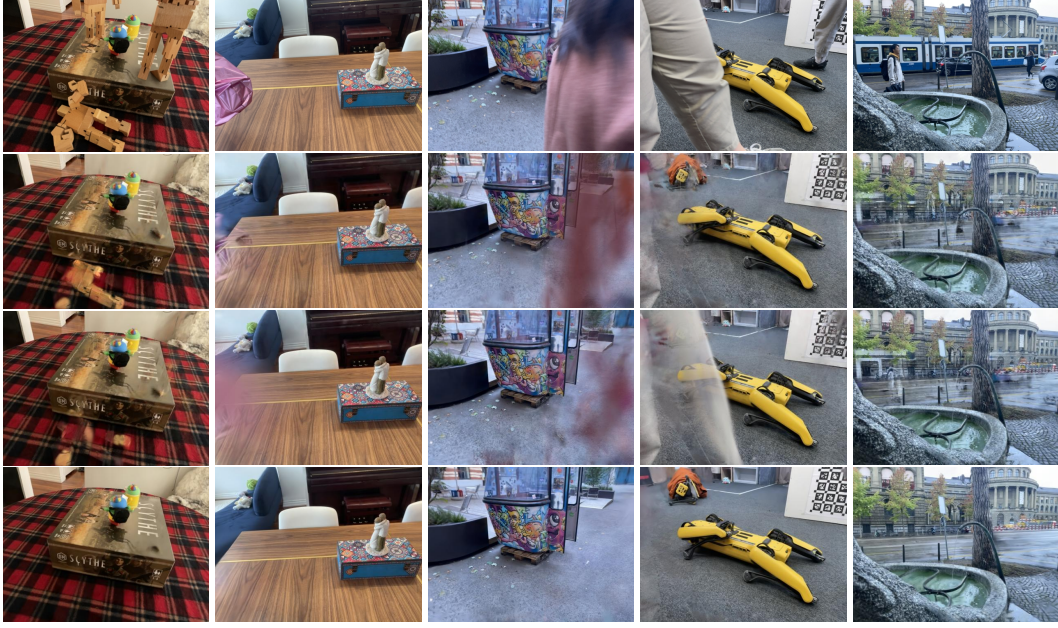

Figure 6: Randomness of artifacts across training runs. Row 1 shows the target view (with the presence of distractors); Rows 2 and 3 present results from two independent runs of Mip-Splatting; Row 4 shows the result of our method with the mutual consistency regularization.

## A Random nature of artifacts

As shown in Figure 1 and 6, different runs of 3DGS on the same scene (with only the view order randomized) result in different artifacts, particularly in uncertain regions. The mutual consistency loss helps suppress these artifacts in both models. On one hand, the shared static regions remain consistent and act as a strong regularizer. On the other hand, the differing artifacts in uncertain areas provide complementary supervision signals, allowing regions affected by artifacts in one model to be recovered by the other.

For the effect of distinct masking strategies, Table 4 in the main paper presents a quantitative comparison. The performance degrades when both models use the same mask, for both GS-GS and EMA-GS settings. This supports our claim that using separate masks helps prevent convergence to the same erroneous reconstruction patterns.

## B Comparison with HybridGS

Our Asymmetric Dual 3DGS framework differs fundamentally from HybridGS [13] in both design and training. HybridGS separates static and dynamic content using two models (3DGS for static, 2DGS for dynamic) and requires a staged training process with a learnable blending mask. In contrast, our method uses a dual 3DGS setup with mutual supervision to improve robustness against dynamic noise, all within the standard 3DGS training pipeline. While both methods use masking, HybridGS blends outputs based on 2DGS-derived uncertainty, whereas we apply two distinct masking strategies to reduce confirmation bias from a single, potentially inaccurate mask.

## C Multi-cue adaptive mask

Some prior works [19, 18] use residuals between ground-truth and rendered images to detect distractors, assuming static regions are learned first. However, this can misclassify object boundaries and miss distractors resembling the background. Others [14, 17] use pretrained semantic segmentation to mask known distractors, such as people or sky, but these methods rely on task-specific priors and lack generality across diverse scenes. We propose Multi-Cue Adaptive Masking to combine the strengths

of residual-based and segmentation-based methods, while also providing a complementary hard mask that captures distinct error patterns compared to the self-supervised soft mask.

---

**Algorithm 1** Multi-Cue Adaptive Masking

---

**Require:** Rendered image  $\tilde{\mathbf{I}}$ , ground-truth image  $\mathbf{I}$ , semantic masks  $\{\mathbf{M}_k\}$  from SAM, stereo correspondence map  $\mathbf{S}_{\geq 3}$  from COLMAP

- 1:  $\mathbf{E}_{\text{pix}} = \|\tilde{\mathbf{I}} - \mathbf{I}\|_1$  ▷ Pixel-level residual
- 2:  $\mathbf{F} = \text{DINOv2}(\mathbf{I}); \tilde{\mathbf{F}} = \text{DINOv2}(\tilde{\mathbf{I}})$  ▷ DINOv2 features
- 3:  $\mathbf{E}_{\text{feat}} = 1 - \text{CosineSimilarity}(\tilde{\mathbf{F}}, \mathbf{F})$  ▷ Feature-level residual
- 4:  $\bar{e}_{\text{pix}} = \sum \mathbf{E}_{\text{pix}} / \text{Area}(\mathbf{I})$  ▷ Average residuals over  $\mathbf{I}$
- 5:  $\bar{e}_{\text{feat}} = \sum \mathbf{E}_{\text{feat}} / \text{Area}(\mathbf{I})$
- 6:  $\bar{s} = \sum \mathbf{S}_{\geq 3} / \text{Area}(\mathbf{I})$  ▷ Stereo correspondence density over  $\mathbf{I}$
- 7: **for** each mask  $\mathbf{M}_k$  **do**
- 8:    $e_{\text{pix},k} = \sum \mathbf{M}_k \odot \mathbf{E}_{\text{pix}} / \sum \mathbf{M}_k$  ▷ Average residuals over  $\mathbf{M}_k$
- 9:    $e_{\text{feat},k} = \sum \mathbf{M}_k \odot \mathbf{E}_{\text{feat}} / \sum \mathbf{M}_k$
- 10:    $s = \sum \mathbf{M}_k \odot \mathbf{S}_{\geq 3} / \sum \mathbf{M}_k$  ▷ Stereo correspondence density over  $\mathbf{M}_k$
- 11:   **if**  $e_{\text{pix},k} > \bar{e}_{\text{pix}}$  **and**  $e_{\text{feat},k} > \bar{e}_{\text{feat}}$  **and**  $s < 0.1 \cdot \bar{s}$  **then**
- 12:     Mark  $\mathbf{M}_k$  as a distractor mask
- 13:   **end if**
- 14: **end for**
- 15: **return**  $\mathbf{M}_h = 1 - \bigcup \{\mathbf{M}_k\}_{\text{selected}}$  ▷ 0 for distractor

---

Here, the stereo-based correspondence records the number of matches each pixel in the given image has, based on SIFT feature correspondences proposed in COLMAP [21]. A pixel is considered a valid correspondence (with the stereo correspondence map value set to true at the pixel location) if its match count exceeds a threshold, indicating it likely belongs to a static region. In contrast, distractors typically yield fewer matches due to their limited presence across images. In Algorithm 1,  $\mathbf{S}_{\geq 3}$  denotes the stereo correspondence map, where a pixel is considered a valid correspondence if it has more than three matches.

## D Datasets and metrics

We evaluate our method on three in-the-wild datasets with varying challenges, as shown in Table 5. NeRF On-the-go dataset [18] features indoor and outdoor sequences with consistent appearance but varying distractor ratios (5%–30%). RobustNeRF dataset [19] provides indoor scenes with static geometry and controlled distractor placement (from single-type to 150 varied distractors), where training is done on cluttered views and testing on clean, unseen ones. We use the undistorted versions of these datasets, following the protocols of WildGaussian [11] and HybridGS [13]. The PhotoTourism dataset [6] includes landmark scenes (Brandenburg Gate, Sacre Coeur, Trevi Fountain) captured under diverse lighting, weather, and viewpoints, with both significant appearance variation and real-world distractors. We report PSNR, SSIM, and LPIPS [27] to assess reconstruction accuracy and perceptual quality.

## E Implementation details

Our base model is built on Mip-Splatting [25]. Following its default settings, we recompute the sampling rate of each Gaussian every 100 iterations, with a 2D Mip filter variance of 0.1 and a 3D smoothing filter variance of 0.2. We train for 30,000 iterations on NeRF On-the-go and RobustNeRF, with densification and pruning every 1,000 steps until iteration 15,000; and for 100,000 iterations on PhotoTourism, with densification and pruning every 1,000 steps until iteration 50,000. We omit the opacity reset and apply a 1,000-step warm-up before the mutual consistency regularization begins. The consistency regularization weight is set to 0.1. The learnable mask is optimized by a loss weighted  $\lambda_{\text{mask}} = 1.0$  with a learning rate of 0.1. For EMA, we use a smoothing factor of  $\beta = 0.8$ . Semantic regions for the multi-cue adaptive mask are generated using Semantic SAM [12] to create instance-level segmentations and apply Algorithm 1 to select distractor regions as masks.

Table 5: In-the-wild 3D reconstruction datasets.

| Dataset             | Scene            | # Train | # Test | Distractor | Appear. change |
|---------------------|------------------|---------|--------|------------|----------------|
| NeRF On-the-go [18] | Patio-high       | 222     | 45     | ~30%       | No             |
|                     | Spot             | 168     | 10     | ~30%       | No             |
|                     | Patio            | 98      | 26     | 15%~20%    | No             |
|                     | Corner           | 101     | 20     | 15%~20%    | No             |
|                     | Fountain         | 168     | 17     | 5%~10%     | No             |
|                     | Mountain         | 119     | 12     | 5%~10%     | No             |
| RobustNeRF [19]     | Statue           | 255     | 19     | 1 type     | No             |
|                     | Android          | 122     | 19     | 1 type     | No             |
|                     | Yoda             | 109     | 202    | 100 types  | No             |
|                     | Crab             | 109     | 194    | 150 types  | No             |
| PhotoTourism [6]    | Brandenburg Gate | 763     | 10     | ~3.5%      | Yes            |
|                     | Sacre Coeur      | 830     | 21     | ~3.5%      | Yes            |
|                     | Trevi Fountain   | 1689    | 19     | ~3.5%      | Yes            |

Additionally, we use a 32-dimensional per-view appearance embedding and a 24-dimensional per-Gaussian embedding. Color transformation is performed using a three-layer MLP with hidden size 128, outputting a scale and bias for each RGB channel. The learning rates are set to 0.001 for the per-view embedding, 0.005 for the per-Gaussian embedding, and 0.0005 for the MLP. The other 3DGS-related hyperparameters follow the setup from origin work shown in Table 6.

Table 6: The other 3DGS-related hyperparameters.

| Parameter              | Value            |
|------------------------|------------------|
| position_lr_init       | 0.00016          |
| position_lr_final      | 0.0000016        |
| position_lr_delay_mult | 0.01             |
| feature_lr             | 0.0025           |
| opacity_lr             | 0.1              |
| scaling_lr             | 0.005            |
| rotation_lr            | 0.001            |
| percent_dense          | 0.01             |
| lambda_dssim           | 0.2              |
| densification_interval | 1000             |
| opacity_reset_interval | No opacity reset |
| densify_from_iter      | 500              |
| densify_grad_threshold | 0.0002           |

Table 7: The code repo and licenses.

| Method                      | Link                                                                                                                        | License            |
|-----------------------------|-----------------------------------------------------------------------------------------------------------------------------|--------------------|
| 3DGS [8]                    | <a href="https://github.com/graphdeco-inria/gaussian-splatting">https://github.com/graphdeco-inria/gaussian-splatting</a>   | Custom             |
| Mip-Splatting [25]          | <a href="https://github.com/autonomousvision/mip-splatting">https://github.com/autonomousvision/mip-splatting</a>           | Custom             |
| WildGaussians [11]          | <a href="https://github.com/jkulhanek/wild-gaussians/">https://github.com/jkulhanek/wild-gaussians/</a>                     | MIT License        |
| NerfBaselines [10]          | <a href="https://github.com/nerfbaselines/nerfbaselines">https://github.com/nerfbaselines/nerfbaselines</a>                 | MIT License        |
| COLMAP [21]                 | <a href="https://github.com/colmap/colmap">https://github.com/colmap/colmap</a>                                             | BSD License        |
| Semantic-SAM [12]           | <a href="https://github.com/UX-Decoder/Semantic-SAM">https://github.com/UX-Decoder/Semantic-SAM</a>                         | Apache 2.0 License |
| NeRF On-the-go dataset [18] | <a href="https://github.com/cvg/nerf-on-the-go">https://github.com/cvg/nerf-on-the-go</a>                                   | Apache 2.0 License |
| RobustNeRF dataset [19]     | <a href="https://robustnerf.github.io/">https://robustnerf.github.io/</a>                                                   | Custom             |
| PhotoTourism dataset [6]    | <a href="https://github.com/ubc-vision/image-matching-benchmark">https://github.com/ubc-vision/image-matching-benchmark</a> | Apache 2.0 License |

Table 8: Quantitative results on the NeRF On-the-go dataset [18]. The best and second-best results are highlighted in **bold** and underline, respectively.

| Scene               | Mountain        |                 |                    | Fountain        |                 |                    | Corner          |                 |                    | Patio           |                 |                    | Spot            |                 |                    | Patio-High      |                 |                    |
|---------------------|-----------------|-----------------|--------------------|-----------------|-----------------|--------------------|-----------------|-----------------|--------------------|-----------------|-----------------|--------------------|-----------------|-----------------|--------------------|-----------------|-----------------|--------------------|
| Method              | PSNR $\uparrow$ | SSIM $\uparrow$ | LPIPS $\downarrow$ | PSNR $\uparrow$ | SSIM $\uparrow$ | LPIPS $\downarrow$ | PSNR $\uparrow$ | SSIM $\uparrow$ | LPIPS $\downarrow$ | PSNR $\uparrow$ | SSIM $\uparrow$ | LPIPS $\downarrow$ | PSNR $\uparrow$ | SSIM $\uparrow$ | LPIPS $\downarrow$ | PSNR $\uparrow$ | SSIM $\uparrow$ | LPIPS $\downarrow$ |
| RobustNeRF [19]     | 17.54           | 0.496           | 0.383              | 15.65           | 0.318           | 0.576              | 23.04           | 0.764           | 0.244              | 20.39           | 0.718           | 0.251              | 20.65           | 0.625           | 0.391              | 20.54           | 0.578           | 0.366              |
| NeRF On-the-go [18] | 20.15           | 0.644           | 0.259              | 20.11           | 0.609           | 0.314              | 24.22           | 0.806           | 0.190              | 20.78           | 0.754           | 0.219              | 23.33           | 0.787           | 0.189              | 21.41           | 0.718           | 0.235              |
| 3DGS [8]            | 19.40           | 0.638           | 0.213              | 19.96           | 0.659           | 0.185              | 20.90           | 0.713           | 0.241              | 17.48           | 0.704           | 0.199              | 20.77           | 0.693           | 0.316              | 17.29           | 0.604           | 0.363              |
| Mip-Splatting [25]  | 19.86           | 0.649           | 0.200              | 20.19           | 0.672           | 0.189              | 21.15           | 0.728           | 0.230              | 18.31           | 0.639           | 0.328              | 20.18           | 0.689           | 0.338              | 18.31           | 0.639           | 0.328              |
| WildGaussian [11]   | 20.43           | 0.653           | 0.255              | 20.81           | 0.662           | 0.215              | 24.16           | 0.822           | <b>0.045</b>       | 21.44           | 0.800           | 0.138              | 23.82           | 0.816           | <u>0.138</u>       | 22.23           | 0.725           | 0.206              |
| SLS-nlp [20]        | 19.84           | 0.580           | 0.294              | 20.19           | 0.612           | 0.258              | 24.03           | 0.795           | 0.258              | 21.55           | 0.838           | <b>0.065</b>       | 23.52           | 0.756           | 0.185              | 20.31           | 0.664           | 0.259              |
| HybridGS [13]       | 21.73           | 0.693           | 0.284              | 21.11           | 0.674           | 0.252              | 25.03           | 0.847           | 0.151              | 21.98           | 0.812           | 0.169              | 24.33           | 0.794           | 0.196              | 21.77           | 0.741           | 0.211              |
| Ours (GS-GS)        | <b>22.00</b>    | <b>0.740</b>    | 0.199              | <b>21.83</b>    | <b>0.717</b>    | <u>0.180</u>       | <b>26.15</b>    | <b>0.885</b>    | 0.085              | <b>22.97</b>    | <b>0.860</b>    | 0.096              | <b>25.52</b>    | <b>0.854</b>    | <b>0.135</b>       | <b>23.17</b>    | 0.796           | <u>0.164</u>       |
| Ours (EMA-GS)       | <u>21.93</u>    | <u>0.735</u>    | <b>0.162</b>       | <u>21.61</u>    | <u>0.709</u>    | <b>0.162</b>       | <u>25.77</u>    | <u>0.876</u>    | 0.089              | <u>22.87</u>    | <u>0.853</u>    | <u>0.091</u>       | <u>25.09</u>    | <u>0.839</u>    | 0.152              | <u>23.14</u>    | <b>0.797</b>    | <b>0.156</b>       |

## F More results

### F.1 NeRF On-the-go and RobustNeRF

In Table 1 and Table 8, our method (GS-GS) outperforms all baseline methods by more than 1 dB in scenes with medium to high occlusion ratios. The margin is smaller in low-occlusion scenes, where 3DGS-based methods already perform well due to strong geometric priors from the initial point cloud. A similar trend is observed in Table 2: while the proposed method surpasses the SOTA by approximately 0.4 dB in simpler scenes containing a single distractor type (e.g., Statue and Android), it outperforms others by more than 1 dB in complex scenes with a large number of diverse distractors (e.g., Yoda and Crab). The rendering results in Figure 7 and 8 further demonstrate the superiority of our method, as competing approaches exhibit distractor remains and missing details.

### F.2 PhotoTourism

The Asymmetric Dual 3DGS achieves an average improvement of 0.8 dB on the PhotoTourism dataset (Table 3), demonstrating its effectiveness under challenging appearance variations. Furthermore, proper appearance modeling is essential for handling in-the-wild data with diverse visual conditions. This is supported by a significant performance gap of more than 4 dB between methods with and without appearance modeling, as shown in Table 3, and further illustrated by the visual differences in Figure 9. Therefore, we apply appearance modeling for the PhotoTourism dataset by default. As the importance of appearance modeling is addressed here, we omit further discussion in the following ablation section and apply appearance modeling by default for the PhotoTourism dataset.

### F.3 Statistical significance of the main result

Table 9: Quantitative results on the NeRF On-the-go dataset. Each experiment is repeated five times, and we report the mean and standard deviation.

| Setting          | GS-GS            |                   |                   | EMA-GS           |                   |                   |
|------------------|------------------|-------------------|-------------------|------------------|-------------------|-------------------|
| Scene            | PSNR             | SSIM              | LPIPS             | PSNR             | SSIM              | LPIPS             |
| High Occlusion   | 24.36 $\pm$ 0.02 | 0.823 $\pm$ 0.001 | 0.151 $\pm$ 0.001 | 24.11 $\pm$ 0.05 | 0.819 $\pm$ 0.002 | 0.152 $\pm$ 0.004 |
| Medium Occlusion | 24.52 $\pm$ 0.06 | 0.871 $\pm$ 0.001 | 0.090 $\pm$ 0.001 | 24.26 $\pm$ 0.08 | 0.864 $\pm$ 0.001 | 0.092 $\pm$ 0.002 |
| Low Occlusion    | 21.99 $\pm$ 0.04 | 0.730 $\pm$ 0.001 | 0.184 $\pm$ 0.004 | 21.81 $\pm$ 0.09 | 0.723 $\pm$ 0.002 | 0.166 $\pm$ 0.007 |

Table 10: Quantitative results on the RobustNeRF dataset. Each experiment is repeated five times, and we report the mean and standard deviation.

| Setting | GS-GS            |                   |                   | EMA-GS           |                   |                   |
|---------|------------------|-------------------|-------------------|------------------|-------------------|-------------------|
| Scene   | PSNR             | SSIM              | LPIPS             | PSNR             | SSIM              | LPIPS             |
| Statue  | 23.44 $\pm$ 0.05 | 0.893 $\pm$ 0.001 | 0.098 $\pm$ 0.001 | 23.46 $\pm$ 0.06 | 0.890 $\pm$ 0.001 | 0.097 $\pm$ 0.001 |
| Android | 25.58 $\pm$ 0.05 | 0.856 $\pm$ 0.001 | 0.070 $\pm$ 0.003 | 25.47 $\pm$ 0.06 | 0.849 $\pm$ 0.002 | 0.070 $\pm$ 0.002 |
| Yoda    | 37.12 $\pm$ 0.09 | 0.969 $\pm$ 0.001 | 0.074 $\pm$ 0.001 | 36.46 $\pm$ 0.06 | 0.967 $\pm$ 0.001 | 0.078 $\pm$ 0.001 |
| Crab    | 36.11 $\pm$ 0.07 | 0.963 $\pm$ 0.001 | 0.079 $\pm$ 0.001 | 35.52 $\pm$ 0.07 | 0.961 $\pm$ 0.001 | 0.080 $\pm$ 0.001 |

We repeated the experiment five times. Based on the results in Table 9 and 10, our method shows statistically significant improvements.



## F.4 Hyperparameters

We perform hyperparameter tuning on the NeRF On-the-go dataset [18] to optimize the performance of our method (GS-GS and EMA-GS). As shown in Table 11, we tune the EMA smoothing factor  $\beta$  and find that  $\beta = 0.8$  yields the highest PSNR and SSIM with the lowest LPIPS. In Table 12, we evaluate different densification intervals and observe that an interval of 1000 offers the best overall performance. Similarly, Table 13 presents the results of tuning the warm-up interval, where 1000 again emerges as the optimal choice, outperforming both shorter and longer intervals. Lastly, Table 14 shows that removing opacity reset improves reconstruction quality, suggesting that preserving learned opacity leads to more stable and effective training.

Table 11: Tuning the EMA smoothing factor according to the average performance on the NeRF On-the-go dataset [18].

| $\beta$ | PSNR $\uparrow$ | SSIM $\uparrow$ | LPIPS $\downarrow$ |
|---------|-----------------|-----------------|--------------------|
| 0.5     | 22.80           | 0.797           | 0.136              |
| 0.6     | 22.93           | 0.797           | 0.137              |
| 0.7     | 23.12           | 0.799           | 0.136              |
| 0.8     | 23.40           | 0.801           | 0.135              |
| 0.9     | 23.05           | 0.798           | 0.136              |

Table 12: Tuning the densification interval according to the average performance on the NeRF On-the-go dataset [18].

| Setting                | GS-GS           |                 |                    | EMA-GS          |                 |                    |
|------------------------|-----------------|-----------------|--------------------|-----------------|-----------------|--------------------|
| Densification Interval | PSNR $\uparrow$ | SSIM $\uparrow$ | LPIPS $\downarrow$ | PSNR $\uparrow$ | SSIM $\uparrow$ | LPIPS $\downarrow$ |
| 500                    | 23.60           | 0.810           | 0.129              | 23.00           | 0.797           | 0.134              |
| 1000                   | 23.61           | 0.810           | 0.135              | 23.40           | 0.801           | 0.135              |
| 1500                   | 23.58           | 0.807           | 0.146              | 23.15           | 0.796           | 0.143              |
| 2000                   | 23.56           | 0.806           | 0.152              | 22.96           | 0.797           | 0.145              |

Table 13: Tuning the warm-up interval according to the average performance on the NeRF On-the-go dataset [18].

| Setting          | GS-GS           |                 |                    | EMA-GS          |                 |                    |
|------------------|-----------------|-----------------|--------------------|-----------------|-----------------|--------------------|
| Warm-up Interval | PSNR $\uparrow$ | SSIM $\uparrow$ | LPIPS $\downarrow$ | PSNR $\uparrow$ | SSIM $\uparrow$ | LPIPS $\downarrow$ |
| 0                | 23.55           | 0.808           | 0.137              | 22.96           | 0.798           | 0.135              |
| 500              | 23.55           | 0.809           | 0.137              | 23.08           | 0.799           | 0.134              |
| 1000             | 23.61           | 0.810           | 0.135              | 23.40           | 0.801           | 0.135              |
| 1500             | 23.58           | 0.809           | 0.137              | 23.10           | 0.799           | 0.135              |
| 2000             | 23.60           | 0.810           | 0.135              | 22.88           | 0.798           | 0.136              |

In Table 15 and 16, although the best performance is generally achieved at our default setting ( $\lambda_m = 1.0$  and  $\lambda_{mask} = 1.0$  for GS-GS;  $\lambda_m = 0.1$  and  $\lambda_{mask} = 1.0$  for EMA-GS), the differences across settings are minimal (less than 0.1 dB). This indicates that the performance is not highly sensitive to the values of  $\lambda_m$  and  $\lambda_{mask}$ .

## G Limitations

We adopt the appearance modeling approach from WildGaussian [11], using a per-view appearance embedding to control global appearance and a per-Gaussian embedding to model the appearance of individual Gaussian primitives. However, this model struggles to capture fine-grained effects such as object highlights. A likely reason is the limited diversity in training data. To address this, we plan to introduce data augmentation with randomized illumination variations.

Table 14: Impact of opacity reset on reconstruction quality, evaluated on the NeRF On-the-go dataset [18].

| Setting       | GS-GS           |                 |                    | EMA-GS          |                 |                    |
|---------------|-----------------|-----------------|--------------------|-----------------|-----------------|--------------------|
| Opacity Reset | PSNR $\uparrow$ | SSIM $\uparrow$ | LPIPS $\downarrow$ | PSNR $\uparrow$ | SSIM $\uparrow$ | LPIPS $\downarrow$ |
| w/o           | 23.61           | 0.810           | 0.135              | 23.40           | 0.801           | 0.135              |
| w/            | 22.87           | 0.790           | 0.176              | 22.43           | 0.786           | 0.158              |

Table 15: Performance under varying weights of the mutual consistency loss, evaluated on the NeRF On-the-go dataset [18].

| GS-GS       |       |       |       | EMA-GS      |       |       |       |
|-------------|-------|-------|-------|-------------|-------|-------|-------|
| $\lambda_m$ | PSNR  | SSIM  | LPIPS | $\lambda_m$ | PSNR  | SSIM  | LPIPS |
| 0.0         | 23.13 | 0.808 | 0.135 | 0.0         | 23.10 | 0.801 | 0.132 |
| 0.5         | 23.66 | 0.810 | 0.130 | 0.05        | 23.39 | 0.803 | 0.136 |
| 1.0         | 23.61 | 0.810 | 0.135 | 0.1         | 23.40 | 0.801 | 0.135 |
| 1.5         | 23.54 | 0.807 | 0.142 | 0.2         | 23.43 | 0.805 | 0.133 |
| 2.0         | 23.44 | 0.803 | 0.149 | 0.3         | 23.47 | 0.805 | 0.134 |

Table 16: Performance under varying weights of the learnable mask loss, evaluated on the NeRF On-the-go dataset [18].

| Setting          | GS-GS |       |       | EMA-GS |       |       |
|------------------|-------|-------|-------|--------|-------|-------|
| $\lambda_{mask}$ | PSNR  | SSIM  | LPIPS | PSNR   | SSIM  | LPIPS |
| 0.5              | 23.62 | 0.809 | 0.136 | 23.33  | 0.802 | 0.134 |
| 1.0              | 23.61 | 0.810 | 0.135 | 23.40  | 0.801 | 0.135 |
| 1.5              | 23.59 | 0.809 | 0.137 | 23.41  | 0.804 | 0.135 |
| 2.0              | 23.63 | 0.811 | 0.135 | 23.32  | 0.802 | 0.134 |

## H Social impact

Notre-Dame de Paris suffered a devastating fire in 2019. Although the building was severely damaged, restoration was aided by a 3D model originally created for a video game, highlighting the importance of preserving 3D models of cultural landmarks. However, such sites are often crowded with people, and photos taken at different times may exhibit varying lighting conditions. This highlights the broader societal benefit of accessible and robust 3D scene reconstruction technologies. Our method contributes positively by enabling the creation of high-quality 3D models from in-the-wild images, which are often affected by distractors and lighting variations. By making it feasible to reconstruct cultural landmarks from everyday photos, our approach supports digital preservation, education, and historical restoration efforts.

There are potential negative impacts, such as misuse in surveillance or privacy-invading applications. In particular, in-the-wild image collections often contain individuals who are unintentionally captured. To mitigate this risk, we recommend removing or anonymizing identifiable information, such as faces or bodies, from the reconstructed scenes. This can be achieved through automated segmentation or masking techniques applied before or during training.

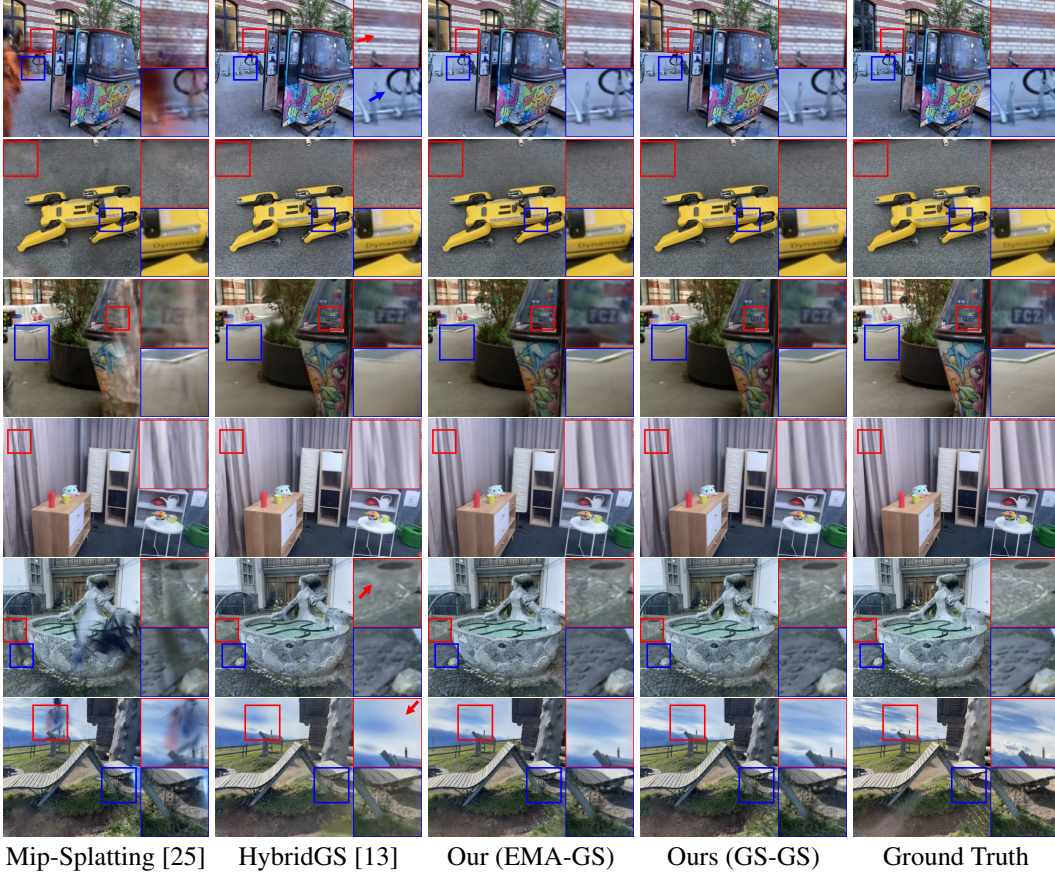

Figure 7: Qualitative results on the NeRF On-the-go dataset [18]. The scenes shown are, from top to bottom: Patio-high (high occlusion), Spot (high occlusion), Patio (medium occlusion), Corner (medium occlusion), Mountain (low occlusion), and Fountain (low occlusion).

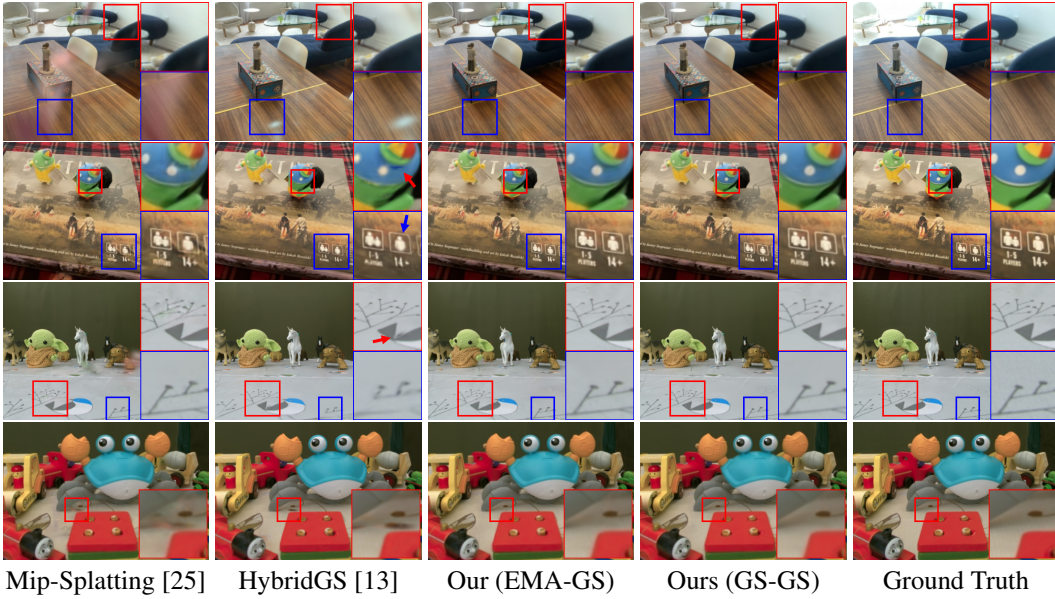

Figure 8: Qualitative results on the RobustNeRF dataset [19]. The scenes shown are, from top to bottom: Statue, Android, Yoda, and Crab.

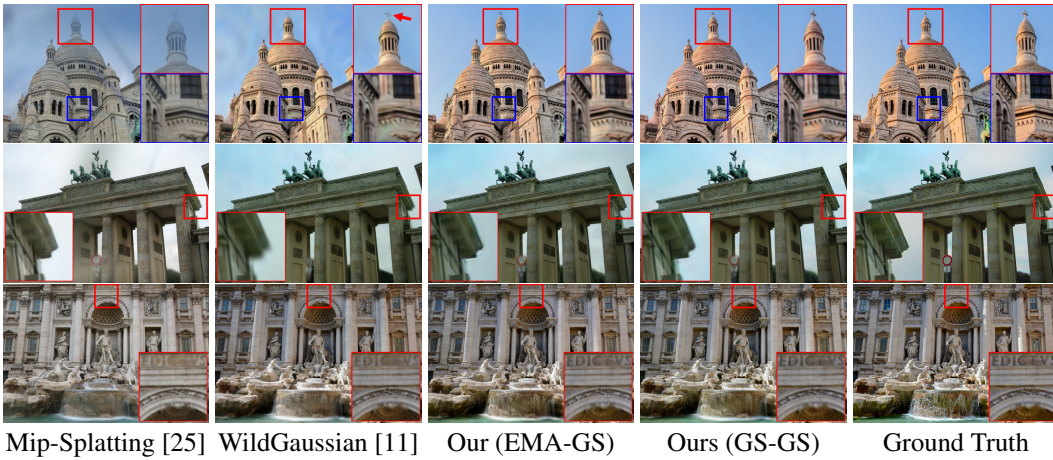

Figure 9: Qualitative results on the PhotoTourism dataset [6]. The scenes shown are, from top to bottom: Sacre Coeur, Brandenburg Gate, and Trevi Fountain.
